# Supplementary material for: Survival and health economic outcomes in heart failure diagnosed at hospital admission versus community settings: a propensity-matched analysis
Source: BMJ Health Care Inform. 2023 Mar 15;30(1):e100718. doi: 10.1136/bmjhci-2022-100718 (PMC10030479; doi:10.1136/bmjhci-2022-100718)
Supplement: Supplementary data [file bmjhci-2022-100718supp001.pdf]

# Appendix

Online Supplementary Table 2

| Read Code v2 | ReadCodePreferredTerm30                                     | Category |
|--------------|-------------------------------------------------------------|----------|
| G58..        | Heart failure                                               | HF       |
| 662g.        | New York Heart Association classification - class II        | HF       |
| 662h.        | New York Heart Association classification - class III       | HF       |
| G5yy9        | Left ventricular systolic dysfunction                       | HF       |
| G580.        | Congestive heart failure                                    | HF       |
| G580.        | Congestive heart failure                                    | HF       |
| 585f.        | Echocardiogram shows left ventricular systolic dysfunction  | HF       |
| 662f.        | New York Heart Association classification - class I         | HF       |
| G581.        | Left ventricular failure                                    | HF       |
| G58z.        | Heart failure NOS                                           | HF       |
| G5802        | Decompensated cardiac failure                               | HF       |
| G5yyC        | Diastolic dysfunction                                       | HF       |
| G580.        | Congestive heart failure                                    | HF       |
| G5yyA        | Left ventricular diastolic dysfunction                      | HF       |
| 585g.        | Echocardiogram shows left ventricular diastolic dysfunction | HF       |
| G5801        | Chronic congestive heart failure                            | HF       |
| G5800        | Acute congestive heart failure                              | HF       |
| G583.        | Heart failure with normal ejection fraction                 | HF       |
| G583.        | Heart failure with normal ejection fraction                 | HF       |
| G581.        | Left ventricular failure                                    | HF       |
| G582.        | Acute heart failure                                         | HF       |
| G580.        | Congestive heart failure                                    | HF       |
| G58..        | Heart failure                                               | HF       |
| G584.        | Right ventricular failure                                   | HF       |
| G581.        | Left ventricular failure                                    | HF       |
| G5810        | Acute left ventricular failure                              | HF       |
| G5804        | Congestive heart failure due to valvular disease            | HF       |
| 21264        | Heart failure resolved                                      | HF       |
| G581.        | Left ventricular failure                                    | HF       |
| G58z.        | Heart failure NOS                                           | HF       |

|       |                                                                     |    |
|-------|---------------------------------------------------------------------|----|
| G5yyB | Right ventricular diastolic dysfunction                             | HF |
| G5803 | Compensated cardiac failure                                         | HF |
| G58z. | Heart failure NOS                                                   | HF |
| G583. | Heart failure with normal ejection fraction                         | HF |
| G580. | Congestive heart failure                                            | HF |
| SP111 | Cardiac insufficiency as a complication of care                     | HF |
| G581. | Left ventricular failure                                            | HF |
| 101.. | Heart failure confirmed                                             | HF |
| G1yz1 | Rheumatic left ventricular failure                                  | HF |
| G232. | Hypertensive heart & renal dis with (congestive) heart failure      | HF |
| G234. | Hypertension heart & renal dis+both (congestv) heart and renal fail | HF |
| G580. | Congestive cardiac failure                                          | HF |
| G580. | Right heart failure                                                 | HF |
| G580. | Right ventricular failure                                           | HF |
| G580. | Biventricular failure                                               | HF |
| G58.. | Cardiac failure                                                     | HF |
| G581. | Asthma - cardiac                                                    | HF |
| G581. | Impaired left ventricular function                                  | HF |
| G58z. | Cardiac failure NOS                                                 | HF |
| 14A6. | H/O: heart failure                                                  | HF |
| 14AM. | H/O: Heart failure in last year                                     | HF |
| SP111 | Heart failure as a complication of care                             | HF |
| 662i. | New York Heart Association classification - class IV                | HF |
| G58z. | Weak heart                                                          | HF |
| G5y4z | Post cardiac operation heart failure NOS                            | HF |
| 1J60. | suspected heart failure                                             | HF |
| 388D. | new york heart assoc classification heart failure symptoms          | HF |
| G210. | malignant hypertensive heart disease                                | HF |
| G2101 | malignant hypertensive heart disease with ccf                       | HF |
| G2111 | benign hypertensive heart disease with ccf                          | HF |
| G21z1 | hypertensive heart disease nos with ccf                             | HF |
| G230. | malignant hypertensive heart and renal disease                      | HF |
| G41z. | chronic cor pulmonale                                               | HF |
| G5540 | congestive cardiomyopathy                                           | HF |

|                                                                          |                                              |           |
|--------------------------------------------------------------------------|----------------------------------------------|-----------|
| <b>G5540</b>                                                             | <b>congestive obstructive cardiomyopathy</b> | <b>HF</b> |
| <b>G5571</b>                                                             | <b>beriberi heart disease</b>                | <b>HF</b> |
| <b>R2y10</b>                                                             | <b>[d]cardiorespiratory failure</b>          | <b>HF</b> |
| <b>ICD10 diagnosis</b>                                                   |                                              |           |
| <b>I500 - Congestive heart failure</b>                                   |                                              |           |
| <b>I501 - Left ventricular failure</b>                                   |                                              |           |
| <b>I509 - Heart failure, unspecified</b>                                 |                                              |           |
| <b>I420 - Dilated cardiomyopathy</b>                                     |                                              |           |
| <b>I255 - Ischaemic cardiomyopathy</b>                                   |                                              |           |
| <b>I110 - Hypertensive heart disease with (congestive) heart failure</b> |                                              |           |
| <b>I429 - Cardiomyopathy, unspecified</b>                                |                                              |           |

**Online Supplementary Table 2.** Discover-NOW and ICD-10 codes for heart failure.

**Online Supplementary Table 3**

| ICD10 diagnosis                                                                     | Number of patients | % of patients |
|-------------------------------------------------------------------------------------|--------------------|---------------|
| J181 - Lobar pneumonia, unspecified                                                 | 1261               | 7%            |
| I214 - Acute subendocardial myocardial infarction                                   | 759                | 4%            |
| I251 - Atherosclerotic heart disease                                                | 676                | 4%            |
| J189 - Pneumonia, unspecified                                                       | 639                | 3%            |
| I489 - Atrial fibrillation and atrial flutter, unspecified                          | 538                | 3%            |
| A419 - Sepsis, unspecified                                                          | 420                | 2%            |
| N390 - Urinary tract infection, site not specified                                  | 335                | 2%            |
| J440 - Chronic obstructive pulmonary disease with acute lower respiratory infection | 310                | 2%            |
| I249 - Acute ischaemic heart disease, unspecified                                   | 301                | 2%            |
| R074 - Chest pain, unspecified                                                      | 280                | 1%            |
| J22X - Unspecified acute lower respiratory infection                                | 277                | 1%            |
| I210 - Acute transmural myocardial infarction of anterior wall                      | 272                | 1%            |
| N179 - Acute renal failure, unspecified                                             | 252                | 1%            |
| J690 - Pneumonitis due to food and vomit                                            | 196                | 1%            |
| R296 - Tendency to fall, not elsewhere classified                                   | 184                | 1%            |
| I48X - Atrial fibrillation and flutter                                              | 177                | 1%            |
| L031 - Cellulitis of other parts of limb                                            | 175                | 1%            |
| U071 - Emergency use of U07.1                                                       | 173                | 1%            |
| I211 - Acute transmural myocardial infarction of inferior wall                      | 172                | 1%            |
| R060 - Dyspnoea                                                                     | 163                | 1%            |
| Other                                                                               | 11,278             | 60%           |

|                    |               |             |
|--------------------|---------------|-------------|
| <b>Grand Total</b> | <b>18,838</b> | <b>100%</b> |
|--------------------|---------------|-------------|

**Online Supplementary Table 3.** Primary diagnosis of patients diagnosed with heart failure coded as their secondary diagnosis.

**Online Supplementary Table 4**

|                                      | <b>Total</b> | <b>Community Pathway</b> | <b>%</b> | <b>Hospital Pathway</b> | <b>%</b> | <b>p-value</b> |
|--------------------------------------|--------------|--------------------------|----------|-------------------------|----------|----------------|
| <b>Total number of comorbidities</b> |              |                          |          |                         |          | <0.0001        |
| <b>0</b>                             | -            | 936                      | 9        | 2020                    | 9        |                |
| <b>1</b>                             | -            | 2479                     | 23       | 4822                    | 21       |                |
| <b>2</b>                             | -            | 3073                     | 28       | 6497                    | 28       |                |
| <b>3</b>                             | -            | 4385                     | 40       | 9808                    | 42       |                |

**Online Supplementary Table 4.** Prevalence of multiple comorbidities in each diagnostic pathway.

**Online Supplementary Table 5**

|                                                                                    | <b>Total</b> | <b>Community Pathway</b> | <b>%</b> | <b>Hospital Pathway</b> | <b>%</b> | <b>p-value</b> |
|------------------------------------------------------------------------------------|--------------|--------------------------|----------|-------------------------|----------|----------------|
| Patients with at least one HF symptom recorded in primary care prior to index date | 7713         | 2738                     | 35       | 4975                    | 65       | 3.65           |
| Patients with no symptoms of HF recorded in primary care prior to index date       | 26305        | 8135                     | 31       | 18170                   | 69       |                |

**Online Supplementary Table 5.** Prevalence of HF symptoms prior to index date.

**Online Supplementary Table 6**

| <b>Health service utilisation</b>              | <b>Community</b> | <b>Hospital</b> |
|------------------------------------------------|------------------|-----------------|
| ED attendances (before diagnosis)              | £297             | £398            |
| ED attendances (after diagnosis)               | £457             | £552            |
| Diagnosis spell in hospital                    | -                | £4,207          |
| Non-elective admission (before diagnosis)      | £3,328           | £4,397          |
| Non-elective admission (after diagnosis)       | £6,699           | £8,749          |
| Day case elective procedure (before diagnosis) | £1,165           | £1,276          |
| Day case elective procedure (after diagnosis)  | £1,335           | £1,358          |
| Elective admission before diagnosis            | £3,189           | £2,788          |
| Elective admission after diagnosis             | £3,365           | £3,572          |
| Outpatient (first visit) before diagnosis      | £418             | £457            |
| Outpatient (first visit) after diagnosis       | £496             | £504            |
| Outpatient (follow-up) before diagnosis        | £335             | £443            |
| Outpatient (follow-up) after diagnosis         | £396             | £411            |
| Outpatient procedure (before diagnosis)        | £367             | £406            |
| Outpatient procedure (after diagnosis)         | £390             | £389            |
| Primary care encounters (before diagnosis)     | £4471            | £4,876          |
| Primary care encounters (after diagnosis)      | £4869            | £2,136          |
|                                                |                  |                 |
| <b>Total</b>                                   | <b>£29,864</b>   | <b>£36,919</b>  |
| <b>Difference</b>                              |                  | <b>£7,055</b>   |

**Online Supplementary Table 6.** Non-propensity matched cost consequence analysis by diagnostic pathway.
